# Supplementary material for: Ferromagnetism of Fe3Sn and Alloys
Source: PubMed Central journal article supplement — Sci Rep. 2014 Nov 12;4:7024. doi: 10.1038/srep07024 (PMC4228330; doi:10.1038/srep07024), 2014-11-12
Supplement: srep07024-s1.pdf [file srep07024-s1.pdf]

Supplementary information for

**Ferromagnetism of Fe<sub>3</sub>Sn and Alloys**

Brian C. Sales, Bayrammurad Saparov, Michael A. McGuire, David J. Singh, and David S.  
Parker

Materials Science and Technology Division

Oak Ridge National Laboratory, Oak Ridge TN. 37831-6056

[salesbc@ornl.gov](mailto:salesbc@ornl.gov)

## SUPPLEMENTARY INFORMATION Single crystal X-ray diffraction data collection

Single crystal X-ray diffraction measurements were performed on a Bruker SMART APEX CCD-based single crystal X-ray diffractometer with Mo  $K\alpha$  ( $\lambda = 0.71073 \text{ \AA}$ ) radiation. Needle crystals of  $\text{Fe}_5\text{Sn}_3$  were selected under a microscope and cut to a suitable size ( $<0.1 \text{ mm}$  on all sides) under Paratone N oil. The crystals were then cooled to  $173(2) \text{ K}$  using a cold nitrogen stream and X-ray intensity data were collected at this temperature. The structure solution by direct methods and refinement by full matrix least-squares methods on  $F^2$  were carried out using the SHELXTL software package [1]. SADABS was used to apply absorption correction.

### Crystal Structure description and discussion

The  $\text{Ni}_2\text{In}$  structure type (space group  $P6_3/mmc$ ) is derived from the ubiquitous NiAs structure by filling all the trigonal bipyramidal voids. In the Fe-Sn binary system, this filled structure corresponds to a hypothetical  $\text{Fe}_2\text{Sn}$  formula. Among the reported compounds in this binary system, there are two Fe-deficient  $\text{Fe}_{2-x}\text{Sn}$  compositions, namely,  $\text{Fe}_5\text{Sn}_3$  and  $\text{Fe}_3\text{Sn}_2$ , which contain partially filled trigonal bipyramidal  $2d$  ( $1/3$ ,  $2/3$ ,  $3/4$ ) site. The partially filled structures are more complex than the simple  $\text{Ni}_2\text{In}$ -type, and the challenge of assigning the correct space group and determining the detailed crystal structures of these phases, along with other transition metal based  $T_{2-x}\text{Sn}$  (where  $T = \text{transition metal}$ ) compounds, remains to this day [2,3].

The compound  $\text{Fe}_5\text{Sn}_3$  has been reported to adopt the  $\text{Ni}_2\text{In}$  type structure with the  $2d$  site only  $2/3$  occupied by Fe, with lattice constant of  $a = 4.23 \text{ \AA}$  and  $c = 5.208 \text{ \AA}$  [4]. We began with these parameters for the refinement of the single crystal X-ray data; however, such refinements yielded poor fits, elevated reliability factors and unphysical site occupancy factors. The automated pattern indexing procedure by Bruker SMART software suggested a primitive hexagonal cell with  $a = 16.82 \text{ \AA}$  and  $c = 5.25 \text{ \AA}$ . However, our attempts to refine the structure in this  $4 \times 1$  supercell using various hexagonal space groups were unsuccessful. Consequently, we turned our attention to the related  $T_3\text{Sn}_2$  structures as a source for starting models. There have been conflicting reports on structures of  $T_3\text{Sn}_2$  [2,3]. Interestingly, for  $\text{Co}_3\text{Sn}_2$ , X-ray diffraction patterns could be indexed with a hexagonal superstructure (hs) identical to that observed by us with  $a_{\text{hs}} = 4a_{\text{h}}$  and  $c_{\text{hs}} = c_{\text{h}}$  ( $V_{\text{hs}} = 16V_{\text{h}}$ ) or an orthorhombic (o) superstructure with  $a_{\text{o}} = a_{\text{h}} + 2b_{\text{h}} \approx 3^{1/2}a_{\text{h}}$ ,  $b_{\text{o}} = c_{\text{h}}$  and  $c_{\text{o}} = 2a_{\text{h}}$  ( $V_{\text{o}} = 4V_{\text{h}}$ ) [2,5]. Due to a lack of single crystals suitable for single crystal X-ray crystallography, however, authors were not able to confirm either cell. Single-domain electron diffraction work and shielded Weissenberg photographs [2] confirmed the orthorhombic structure for  $\text{Ni}_3\text{Sn}_2$  and  $\text{Co}_3\text{Sn}_2$ ; however, X-ray diffraction work gave conflicting conclusions with some favoring the hexagonal structure.

After our failed attempts with the hexagonal superstructure (see above), we subsequently used the described orthorhombic supercell [2] for Fe<sub>5</sub>Sn<sub>3</sub>. An immediate improvement in reliability factors is noticeable, and our work confirms the orthorhombic structure for Fe<sub>5</sub>Sn<sub>3</sub>. The orthorhombic distortion from hexagonal cell calculated using  $[2 \times 3^{-1/2} a_0 / c_0 - 1]$  is ~0.3%. In addition to the presence of Fe vacancies, we also noticed elongations of Sn thermal ellipsoids, and the final refinement included a splitting of Sn2 position. Summary of single crystal X-ray diffraction data and refinement parameters are provided in Table. Atomic coordinates and equivalent isotropic displacement parameters are listed in Table 2. The structure is shown in Figure S1.

This orthorhombic crystal structure accounts for some of the observed super-lattice reflections observed by powder diffraction, but not others. This suggests that the powder samples may contain multiple crystallographic phases with similar chemical compositions but structures with varying degrees or types of Fe-vacancy order or Sn disorder.

Table 1. Crystal data and structure refinement for Fe<sub>5</sub>Sn<sub>3</sub>.

|                                   |                                             |          |
|-----------------------------------|---------------------------------------------|----------|
| Empirical formula                 | Fe <sub>1.65</sub> Sn <sub>1.01</sub>       |          |
| Temperature                       | 173(2) K                                    |          |
| Wavelength                        | 0.71073 Å                                   |          |
| Crystal system                    | Orthorhombic                                |          |
| Space group                       | P n m a                                     |          |
| Unit cell dimensions              | a = 7.2997(10) Å                            | α = 90°. |
|                                   | b = 5.2473(7) Å                             | β = 90°. |
|                                   | c = 8.4026(11) Å                            | γ = 90°. |
| Volume                            | 321.85(7) Å <sup>3</sup>                    |          |
| Z                                 | 8                                           |          |
| Density (calculated)              | 8.757 Mg/m <sup>3</sup>                     |          |
| Theta range for data collection   | 3.70 to 26.37°.                             |          |
| Index ranges                      | -9 ≤ h ≤ 9, -6 ≤ k ≤ 6, -10 ≤ l ≤ 10        |          |
| Reflections collected             | 3519                                        |          |
| Independent reflections           | 365 [R(int) = 0.0211]                       |          |
| Completeness to theta = 26.37°    | 99.7 %                                      |          |
| Refinement method                 | Full-matrix least-squares on F <sup>2</sup> |          |
| Data / restraints / parameters    | 365 / 0 / 43                                |          |
| Goodness-of-fit on F <sup>2</sup> | 1.237                                       |          |
| Final R indices [I > 2σ(I)]       | R1 = 0.0721, wR2 = 0.1936                   |          |
| R indices (all data)              | R1 = 0.0733, wR2 = 0.1942                   |          |

Largest diff. peak and hole

6.245 and -3.334 e / Å<sup>3</sup>

---

Table 2. Atomic coordinates, site occupancy, and equivalent isotropic displacement parameters ( $\text{\AA}^2 \times 10^3$ ) for  $\text{Fe}_5\text{Sn}_3$ .  $U(\text{eq})$  is defined as one third of the trace of the orthogonalized  $U_{ij}$  tensor.

|        | x          | y          | z          | occupancy | $U(\text{eq})$ |
|--------|------------|------------|------------|-----------|----------------|
| Sn(1)  | 0.0989(4)  | 0.2500     | 0.6386(3)  | 1         | 20(1)          |
| Sn(2A) | 0.0569(12) | 0.2500     | 1.0898(17) | 0.67(6)   | 7(2)           |
| Sn(2B) | 0.094(5)   | 0.2500     | 1.135(3)   | 0.34(5)   | 35(5)          |
| Fe(1)  | 0.2653(4)  | -0.0043(6) | 0.8738(4)  | 1         | 12(1)          |
| Fe(2)  | 0.0866(8)  | -0.2500    | 0.6273(6)  | 1         | 20(1)          |
| Fe(3)  | -0.072(3)  | 0.2500     | 0.8778(19) | 0.31(3)   | 21(6)          |

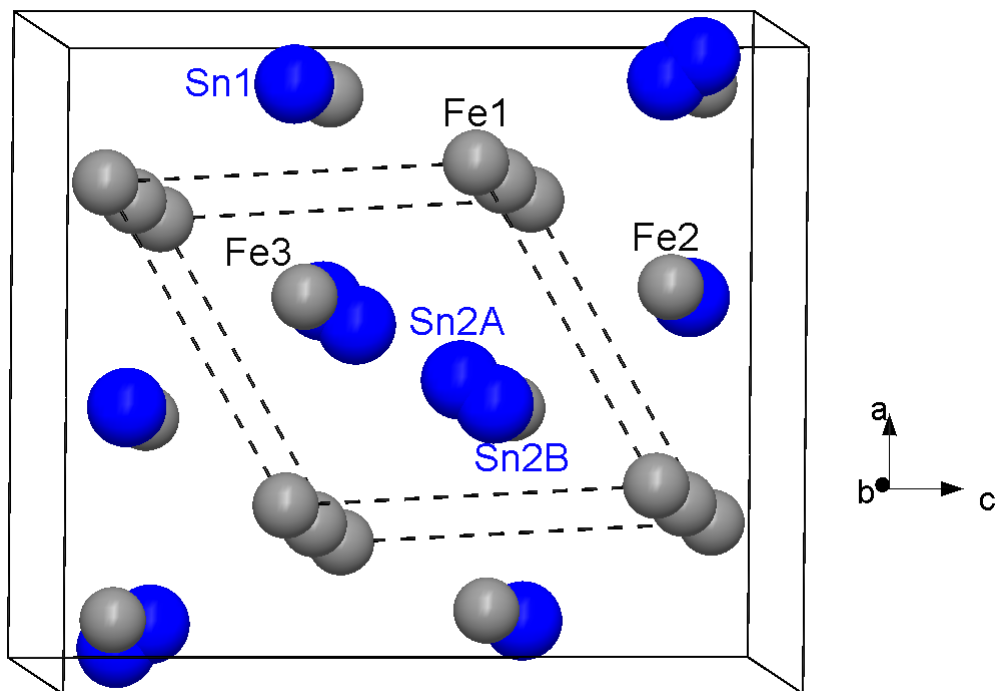

Figure S1. Orthorhombic crystal structure of Fe<sub>5</sub>Sn<sub>3</sub>. The solid lines outline the unit cell. The dashed lines outline the Ni<sub>2</sub>In-type hexagonal sub-cell.

- [1] G. M. Sheldrick, *Acta Cryst. A* 64, 112 (2008).
- [2] A.-K. Larsson, L. Stenberg, S. Lidin, *Acta Chemica Scandinavica* 49, 800 (1995).
- [3] H. Giefers, M. Nicol, *Journal of Alloys and Compounds* 422, 132 (2006).
- [4] C. Jannin P. Lecocq, A. Michel, *C. R. Hebd. Seances Acad. Sci.* 257, 1906 (1963).
- [5] H. Fjellvag, A. Kjekshus, *Acta Chemica Scandinavica A* 40, 23 (1986).
